# Supplementary material for: Identification and Functional Characterization of the Nonexpressor of Pathogenesis-Related Genes 1 (NPR1) Gene in the Tea Plant (Camellia sinensis)
Source: MDPI journal article supplement (doi:10.3390/f14081578), 2023-08-02
Supplement: s1 [file s1]

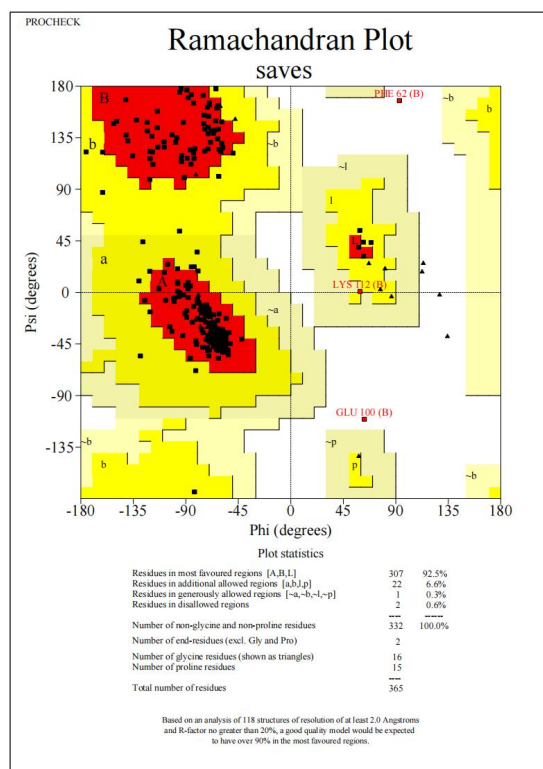

*CsNPR1a*

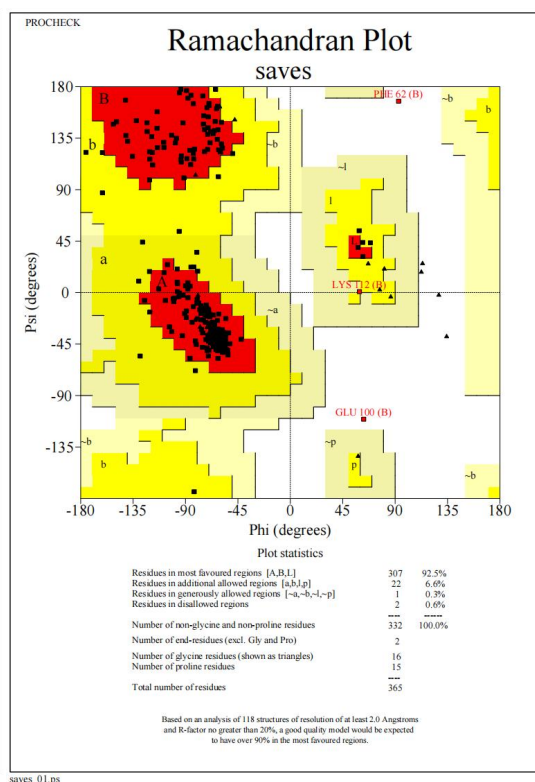

*CsNPR1b*

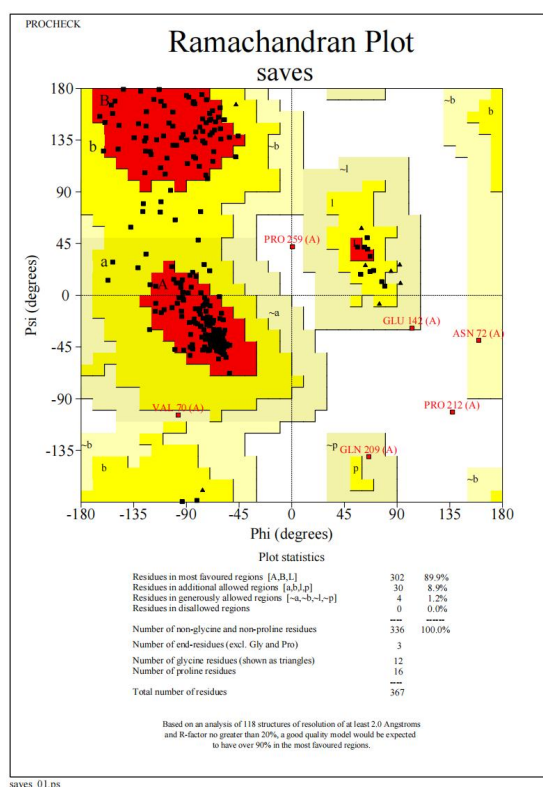

*CsNPR3*

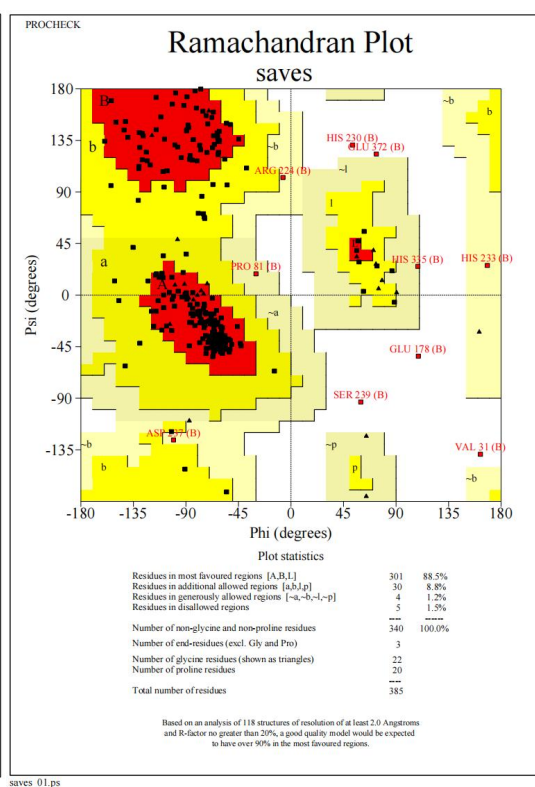

*CsNPR4*

**Figure S1:** Ramachandran Plot of a tertiary structural model of four CsNPR1-like proteins of tea plant.
